# Supplementary material for: Multifunctional TiO2 Nanotube-Matrix Composites with Enhanced Photocatalysis and Lithium-Ion Storage Performances
Source: MDPI journal article supplement (doi:10.3390/ma16072716), 2023-03-29
Supplement: s1 [file s1]

# Multifunctional TiO<sub>2</sub> Nanotube-Matrix Composites with Enhanced Photocatalysis and Lithium-Ion Storage Performances

Mengmeng Zhang, Hui Li \* and Chunrui Wang \*

Shanghai Institute of Intelligent Electronics and Systems, College of Science, Donghua University, Shanghai 201620, China

\* Correspondence: huili@dhu.edu.cn (H.L.); crwang@dhu.edu.cn (C.W.)

## Material Characterization

The morphology of as-prepared samples was detected by the field emission scanning electron microscope (FESEM, Hitachi, S-4800) and the high-resolution transmission electron microscopy (HRTEM, TECHAI G2S-TWIN). The structures were analyzed with X-ray diffraction (XRD, Rigaku-D/max-2550VB+/PC X-ray diffractometer,  $\lambda=1.54056 \text{ \AA}$ ). Various samples' Raman spectra were recorded on a LABRAM-1 Bconfocal laser micro-Raman spectrometer (532 nm radiation) at room temperature.

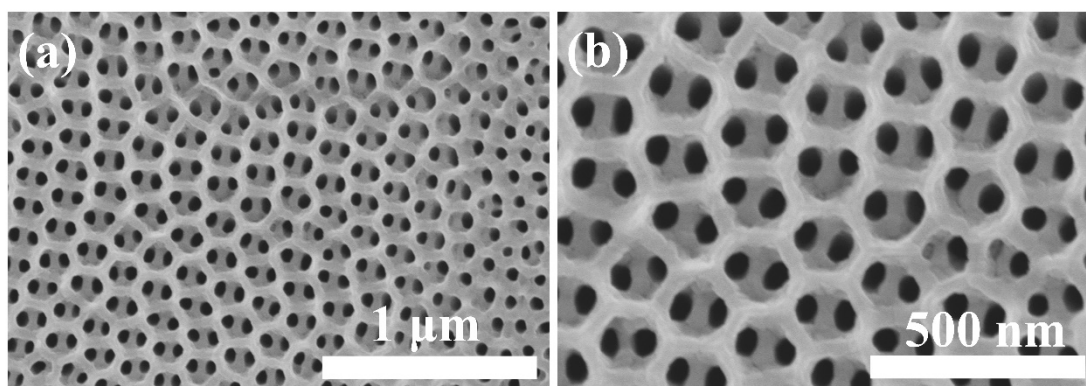

**Figure S1.** (a) Low magnification and (b) high magnification SEM images of as-annealed secondary oxidized TiO<sub>2</sub> nanotube (TiO<sub>2</sub> NT).

---

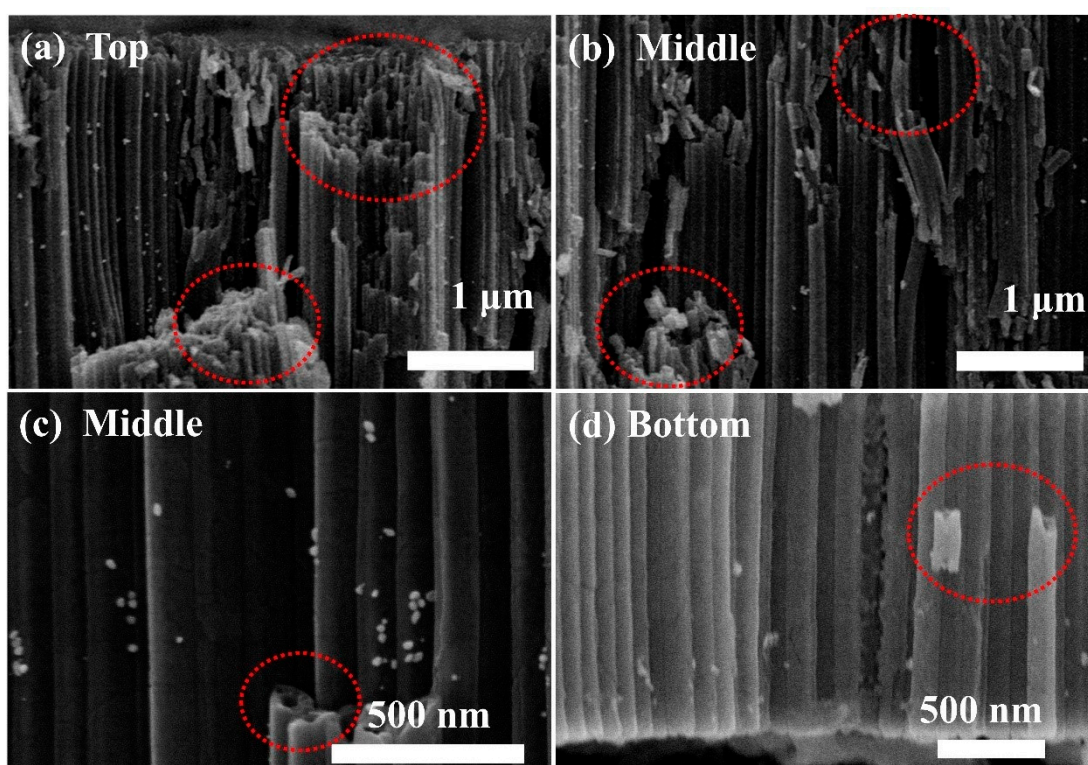

**Figure S2.** SEM images of the (a) top, (b,c) middle, and (d) bottom parts of the TiO<sub>2</sub> NT@Au NP composite.

SEM images of different parts of the TiO<sub>2</sub> NT@Au NP composite show that there are no gold nanoparticles attached to the inner surface of TiO<sub>2</sub> nanotubes (as marked positions). Thus, Au nanoparticles only adhere to the outer surface of the TiO<sub>2</sub> nanotubes. And The adhesion of Au NP to TiO<sub>2</sub> NT may be related to the defects of the TiO<sub>2</sub> nanotubes, which are distributed on the top and outer surfaces of the nanotubes [1].

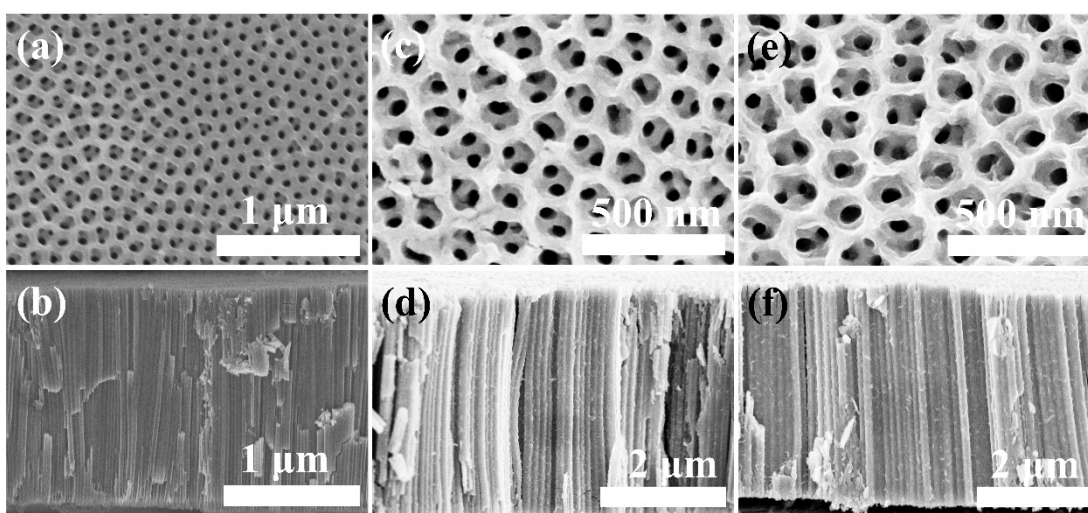

**Figure S3.** When the surfactant (PVP) is not present, the MoS<sub>2</sub> nanosheet cannot be coated on the TiO<sub>2</sub> nanotube, and (a,b) is the corresponding SEM images. SEM images of TiO<sub>2</sub> nanotube@MoS<sub>2</sub> nanosheet composites when the mass of PVP surfactant is (c,d) 0.1 g (TiO<sub>2</sub> NT@MoS<sub>2</sub> NS, 0.1 g) and (e,f) 0.3 g (TiO<sub>2</sub> NT@MoS<sub>2</sub> NS, 0.3 g).

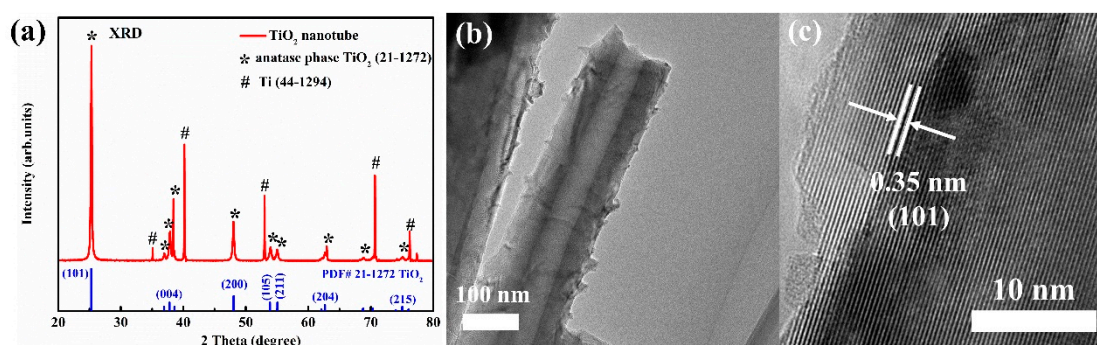

**Figure S4.** (a) XRD of TiO<sub>2</sub> nanotube, as well as (b) TEM and (c) HRTEM images of TiO<sub>2</sub> nanotube.

The XRD pattern of TiO<sub>2</sub> NT (Figure S3a) shows the characteristic peaks of anatase phase TiO<sub>2</sub> (PDF #21-1272) and Ti (PDF #44-1294) substrate without impurity peaks, revealing the anatase crystal structure of the TiO<sub>2</sub> NT [2–4]. High-resolution TEM (HRTEM) images of TiO<sub>2</sub> NTs (Figure S3c) display a typical lattice spacing of 0.35 nm, which is ascribed to the (101) plane of anatase phase TiO<sub>2</sub> [4–6].

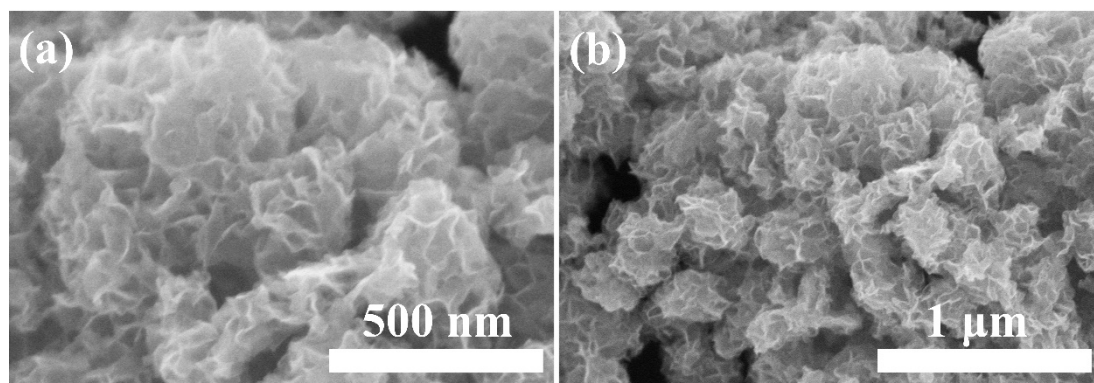

**Figure S5.** (a) High magnification and (b) low magnification SEM images of MoS<sub>2</sub> powder.

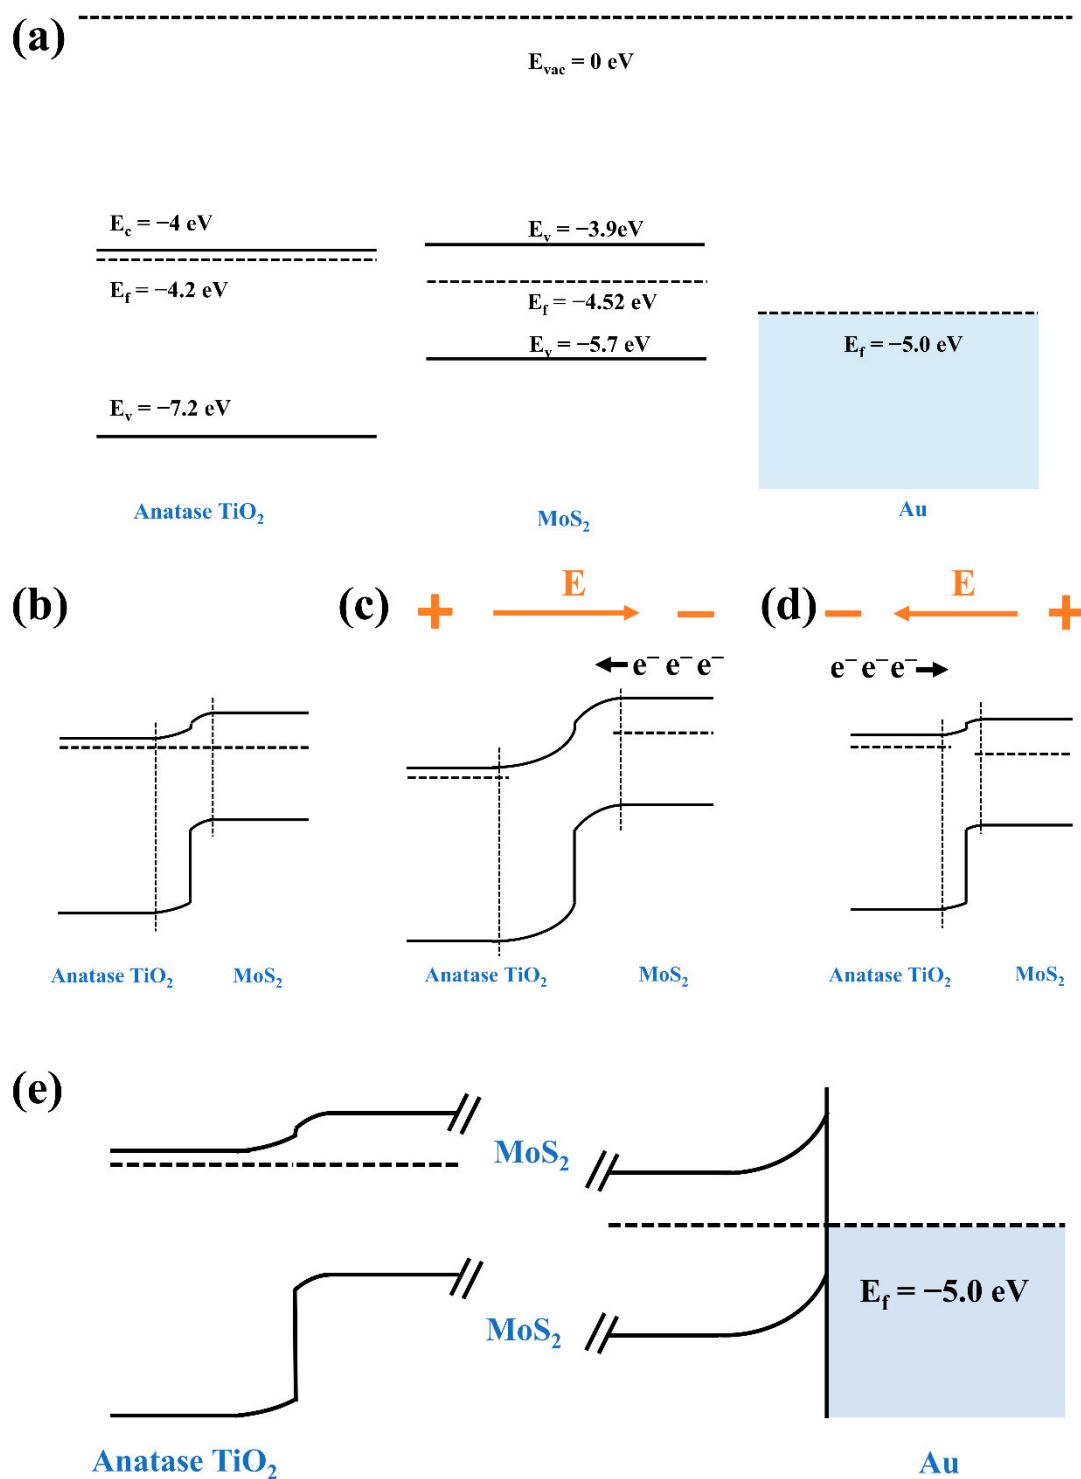

**Figure S6.** (a) Energy-band diagrams of  $\text{TiO}_2$  nanotube,  $\text{MoS}_2$  nanosheet and Au nanoparticle. (b–d) Energy-band diagrams of  $\text{TiO}_2$  nanotube@ $\text{MoS}_2$  nanosheet composite. (e) Energy-band diagrams of  $\text{TiO}_2$  nanotube@ $\text{MoS}_2$  nanosheet@ Au nanoparticle composite.



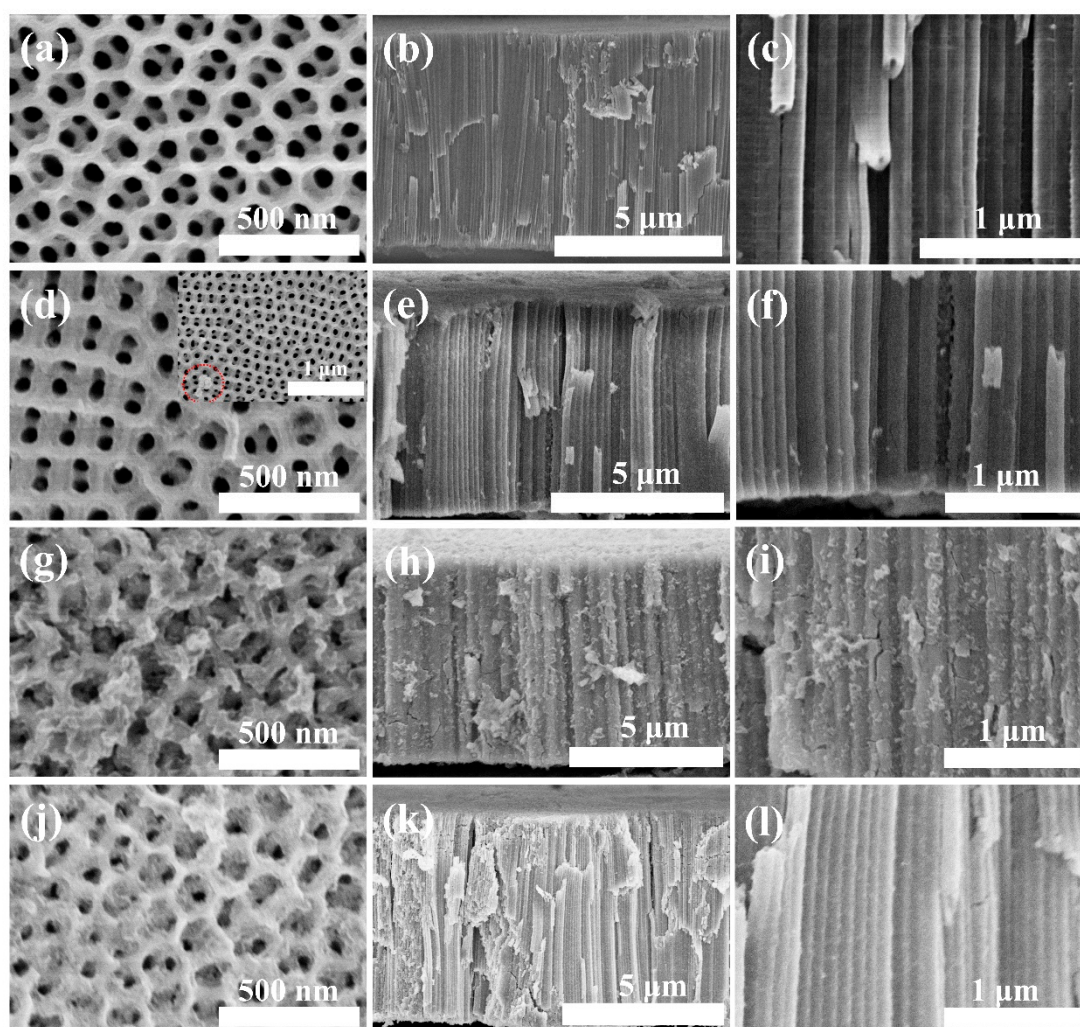

**Figure S7.** SEM images of four different anode materials, after 50 cycles, at  $100 \mu\text{A cm}^{-2}$ . SEM images of cycled (a–c)  $\text{TiO}_2$  nanotube anode, (d–f)  $\text{TiO}_2$  nanotube@Au nanoparticle anode, (g–i)  $\text{TiO}_2$  nanotube@ $\text{MoS}_2$  nanosheet anode and (j–l)  $\text{TiO}_2$  nanotube@ $\text{MoS}_2$  nanosheet@ Au nanoparticle anode.

## References

1. Zhang, M.M.; Lu, A.J.; Li, H.; Li, M.; Wang, J.L.; Wang, C.R. Defective  $\text{TiO}_2$ -Supported Dual-Schottky Heterostructure Boosts Fast Reaction Kinetics for High Performance Lithium-Ion Storage. *ACS Appl. Energy Mater.* **2023**, doi:10.1021/acsaem.2c03668.
2. Chen, K.; Guo, H.N.; Li, W.Q.; Wang, Y.J. MOF-derived Core-Shell  $\text{CoP@NC@TiO}_2$  Composite as a High-Performance Anode Material for Li-ion Batteries. *Chem.-Asian J.* **2021**, *16*, 322–328.
3. Liu, Y.; Luo, Y.F.; Elzatahry, A.A.; Luo, W.; Che, R.C.; Fan, J.W.; Lan, K.; Al-Enizi, A.M.; Sun, Z.K.; Li, B.; et al. Mesoporous  $\text{TiO}_2$  Mesocrystals: Remarkable Defects-Induced Crystallite-Interface Reactivity and Their in Situ Conversion to Single Crystals. *ACS Central Sci.* **2015**, *1*, 400–408.
4. Tan, B.Y.; Zhang, X.H.; Li, Y.J.; Chen, H.; Ye, X.Z.; Wang, Y.; Ye, J.F. Anatase  $\text{TiO}_2$  Mesocrystals: Green Synthesis, In Situ Conversion to Porous Single Crystals, and Self-Doping  $\text{Ti}^{3+}$  for Enhanced Visible Light Driven Photocatalytic Removal of  $\text{NO}$ . *Chem.-Eur. J.* **2017**, *23*, 5478–5487.
5. Liao, J.Y.; Lei, B.X.; Wang, Y.F.; Liu, J.M.; Su, C.Y.; Kuang, D.B. Hydrothermal Fabrication of Quasi-One-Dimensional Single-Crystalline Anatase  $\text{TiO}_2$  Nanostructures on FTO Glass and Their Applications in Dye-Sensitized Solar Cells. *Chem.-Eur. J.* **2011**, *17*, 1352–1357.
6. Fang, Y.Z.; Zhang, Y.Y.; Miao, C.X.; Zhu, K.; Chen, Y.; Du, F.; Yin, J.L.; Ye, K.; Cheng, K.; Yan, J.; et al. MXene-Derived Defect-Rich  $\text{TiO}_2$ @rGO as High-Rate Anodes for Full Na Ion Batteries and Capacitors. *Nano-Micro Lett.* **2020**, *12*, 128.
